# Supplementary material for: Research priorities in pernicious anaemia: James Lind Alliance Priority Setting Partnership
Source: HighWire-hosted journal article supplement (doi:10.1136/bmjopen-2022-065166), 2022-08-01
Supplement: bmjopen-2022-065166supp001_data_supplement.pdf [file bmjopen-2022-065166supp001_data_supplement.pdf]

### Supplementary Table 1: Examples of summary questions and groups of original survey responses being summarised

|                                                                                                                                                                                           |
|-------------------------------------------------------------------------------------------------------------------------------------------------------------------------------------------|
| <p><b>Summary question:</b> What are the safest and most effective ways to give B12 to people with PA, tablets, sprays or injections, or a combination? Can better ways be developed?</p> |
| <p><b>Examples of original survey responses:</b></p>                                                                                                                                      |
| Does oral B12 tablets do the same job as the injection?                                                                                                                                   |
| Also I was told to take an oral version if my symptoms were troubling me but I understand that I cannot absorb them so this seems pointless.                                              |
| Recognising that tablets don't work for a lot of people and not to be ignorant to those who need injections.                                                                              |
| Do b12 tablets just raise b12 levels or do they reduce symptoms?                                                                                                                          |
| Evidence that taking additional oral B12 tablets or sprays is beneficial and worthwhile.                                                                                                  |
| Are there any other effective treatment than injections which would mean less frequent visits to GP                                                                                       |
| How important it is to have injections rather than oral tablets                                                                                                                           |
| A treatment other than a painful injection would be good. GPs are very reluctant to offer an alternative.                                                                                 |
| The people who need injections as treatment and those that do not - how to clearly distinguish.                                                                                           |
| More research needed on alternatives to regular injections i.e. patches/vitamin supplements/nasal sprays etc                                                                              |
| <p><b>Summary question:</b> Why do some people with PA still experience symptoms after treatment with B12?</p>                                                                            |
| <p><b>Examples of original survey responses:</b></p>                                                                                                                                      |
| Whether there is any connection between ongoing tiredness even when having regular b12 injections.                                                                                        |
| When treated but still have symptoms.                                                                                                                                                     |
| Why do some symptoms stay after injections                                                                                                                                                |
| would be interested to know why some people respond well to treatment with B12 and others don't                                                                                           |
| why the treatment (B12 injections ) seems to lose its effectiveness over a period of years                                                                                                |
| Why I have not returned to my previous active levels now that I am receiving medication                                                                                                   |
| Why have I not returned to my usual active levels now that I'm receiving injections                                                                                                       |
| I am aware when my symptoms get worse. After a three monthly injection I felt No improvement. If anything my symptoms felt worse.                                                         |
| And why sometimes the effects of the injection don't seem to work                                                                                                                         |
| Why the overwhelming tiredness continues even after injections.                                                                                                                           |
